# Supplementary material for: A “hairy” polymer/3D-foam hybrid for flexible high performance thermal gap filling applications in harsh environments
Source: Royal Society of Chemistry journal article supplement (doi:10.1039/c7ra06297d), 2017-01-01
Supplement: c7ra06297d1.pdf [file c7ra06297d1.pdf]

## Supporting Information

# **A “hairy” polymer/3D-foam hybrid for flexible high performance thermal gap filling applications in harsh environment**

*Manuela Loeblein,<sup>a,b</sup> Lin Jing,<sup>c</sup> Ming Liu,<sup>c, d</sup> Jason Jun Wei Cheah,<sup>c, d</sup> Siu Hon Tsang<sup>d</sup> and Edwin Hang Tong Teo<sup>a,c,\*</sup>*

<sup>a</sup>School of Electrical and Electronic Engineering, Nanyang Technological University, 50 Nanyang Avenue, Singapore 639798, Singapore

<sup>b</sup> CNRS-International NTU Thales Research Alliance (CINTRA) UMI 3288, Research Techno Plaza, 50 Nanyang Drive, Singapore, Singapore 637553

<sup>c</sup> School of Material Science and Engineering, Nanyang Technological University, 50 Nanyang Avenue, Singapore 639798, Singapore

<sup>d</sup>Temasek Laboratories@NTU, 50 Nanyang Avenue, Singapore 639798, Singapore

\*Corresponding Author Email: [HTTEO@ntu.edu.sg](mailto:HTTEO@ntu.edu.sg)

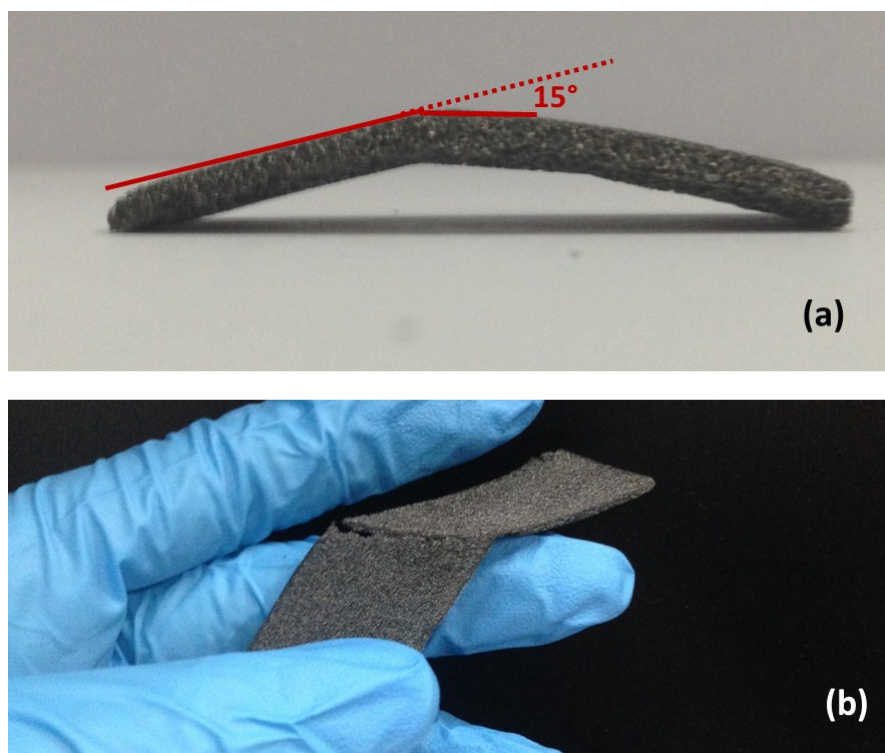

**Figure S1.** Bending studies on bare 3D-foam. **(a)** Point of break, at  $15^\circ$ , **(b)** broken sample.

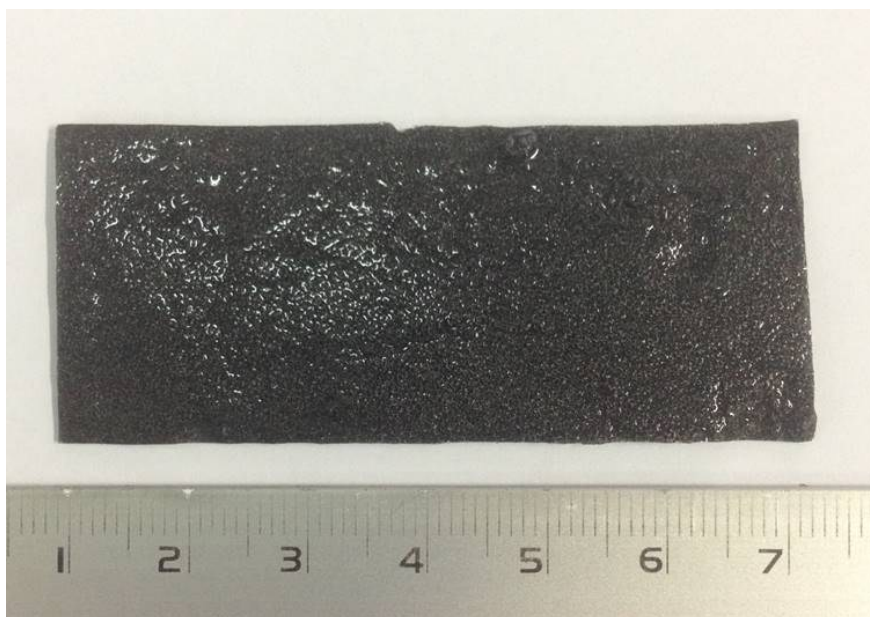

**Figure S2.** Optical image of 3D-C infused with PDMS using conventional method

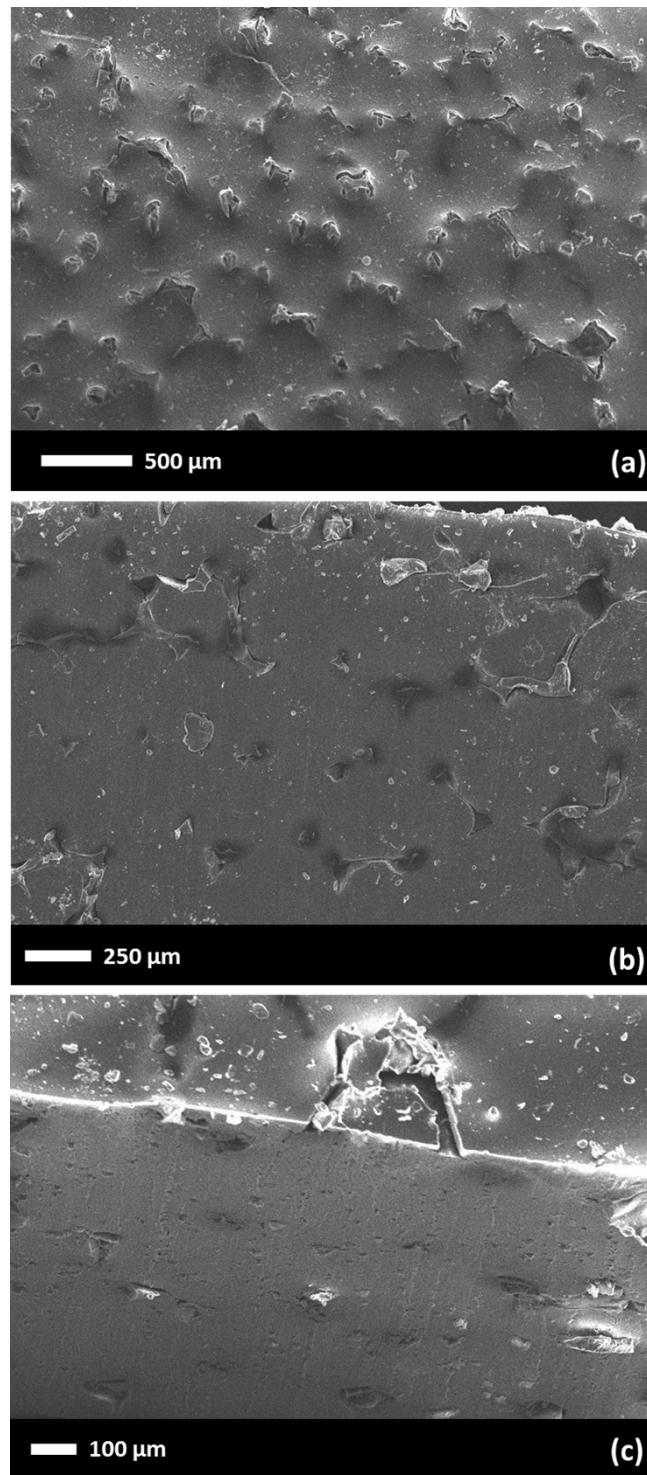

**Figure S3.** SEM imaged of 3D-foams infused with PDMS using conventional method. (a) top view, (b) cross section, (c) tilted view of the edge.

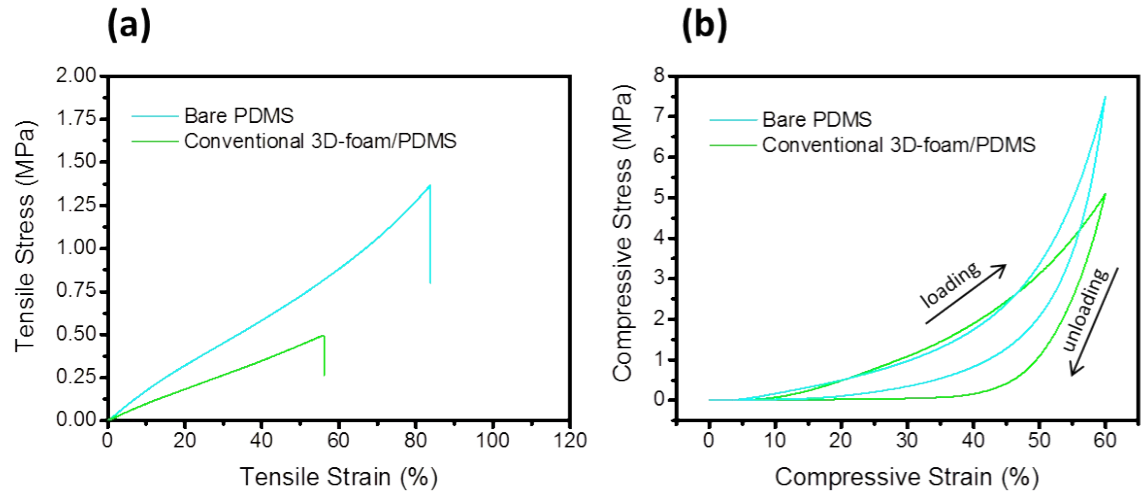

**Figure S4.** Mechanical results of bare PDMS and conventional 3D-foam/PDMS composite **(a)** tensile, **(b)** compression.
